# Supplementary material for: Antisense RNA foci in the motor neurons of C9ORF72-ALS patients are associated with TDP-43 proteinopathy
Source: PubMed Central journal article supplement (PMC4468790; doi:10.1007/s00401-015-1429-9), 2015-05-06
Supplement: 401_2015_1429_MOESM1_ESM.pdf [file 401_2015_1429_MOESM1_ESM.pdf]

| Plasmid name              | Description                                                               | Tag(s)        | Source     |
|---------------------------|---------------------------------------------------------------------------|---------------|------------|
| pET24b-Magoh              | Full length <i>Magoh</i> cloned as NdeI/XhoI PCR fragment into pET24b     | 6His (3')     | [5]        |
| pET24b-SRSF2/SC35 (9-101) | <i>SC35 28-303</i> cloned as NdeI/XhoI PCR fragment into pET24b           | GB1/6His (5') | [26]       |
| pET24b-ALYREF             | Full length <i>ALYREF</i> cloned as NdeI/XhoI PCR fragment into pET24b    | 6His (3')     | [3]        |
| pET24b-hnRNPA1-like2      | Full length <i>hnRNPA1L2</i> cloned as NheI/XhoI PCR fragment into pET24b | 6His (3')     | This study |
| pET24b-hnRNPF             | Full length <i>hnRNPF</i> cloned as NdeI/XhoI PCR fragment into pET24b    | 6His (3')     | This study |
| pET24b-hnRNPH1            | Full length <i>hnRNPH1</i> cloned as NdeI/XhoI PCR fragment into pET24b   | 6His (3')     | This study |
| pET24b-hnRNPK             | Full length <i>hnRNPK</i> cloned as NheI/XhoI PCR fragment into pET24b    | 6His (3')     | This study |
